# Supplementary material for: Promotion of low-temperature oxidation of CO over Pd supported on titania-coated ceria
Source: Royal Society of Chemistry journal article supplement (doi:10.1039/c4ra10167g), 2014-01-01
Supplement: c4ra10167g1.pdf [file c4ra10167g1.pdf]

Supplementary Information

## Promotion of low-temperature oxidation of CO over Pd supported on titania-coated ceria

Atsushi Satsuma,<sup>\*a,b</sup> Masatoshi Yanagihara,<sup>a</sup> Kaoru Osaki,<sup>a</sup> Yurina Saeki,<sup>a</sup> Heng Liu,<sup>a</sup> Yuta Yamamoto,<sup>c</sup> Shigeo Arai,<sup>c</sup> and Junya Ohyama<sup>a,b</sup>

<sup>a</sup> Graduate School of Engineering, Nagoya University, Nagoya 464-8603, Japan.

<sup>b</sup> Unit of Elements Strategy Initiative for Catalysts & Batteries, Kyoto University, Kyoto 615-8530, Japan.

<sup>c</sup> Ecotopia Science Institute, Nagoya University, Nagoya, 464-8603

\* Corresponding author: FAX: +81-52-789-3193; Tel: +81-52-789-4608; E-mail: [satsuma@apchem.nagoya-u.ac.jp](mailto:satsuma@apchem.nagoya-u.ac.jp)

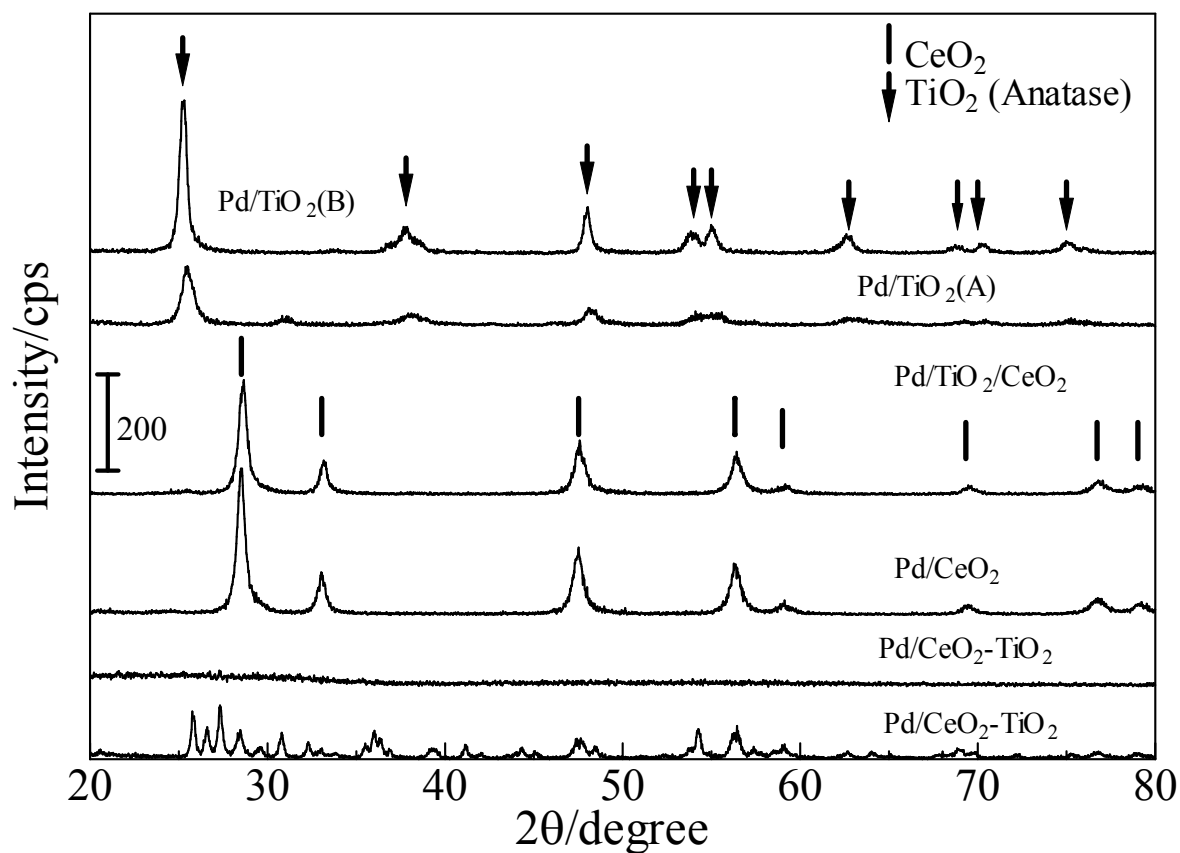

**Fig. S1** XRD patterns of TiO<sub>2</sub>- and CeO<sub>2</sub>-based supported Pd catalysts. The patterns were recorded using XRD patterns were recorded on a Rigaku MiniFlex II/AP diffractometer with Cu K $\alpha$  radiation.

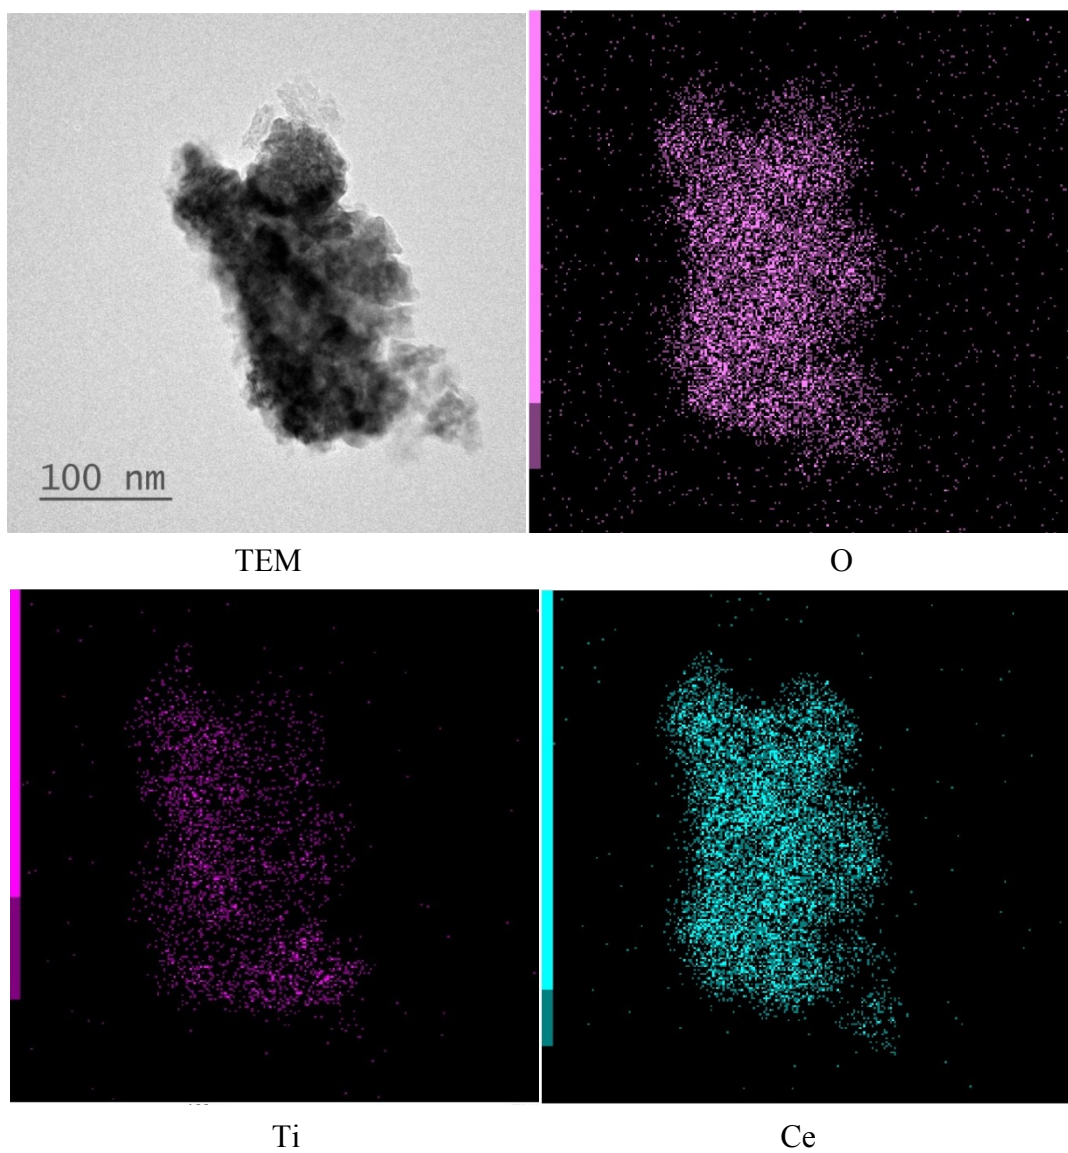

**Fig. 2S** TEM/EDS micrographs of  $\text{TiO}_2/\text{CeO}_2$  support.  $\text{TiO}_2$  (5.4 wt%) was impregnated at 4 °C using  $\text{TiCl}_4$  as a precursor. The micrographs were recorded using JEOL-200 kV Cs-corrected S/TEM.

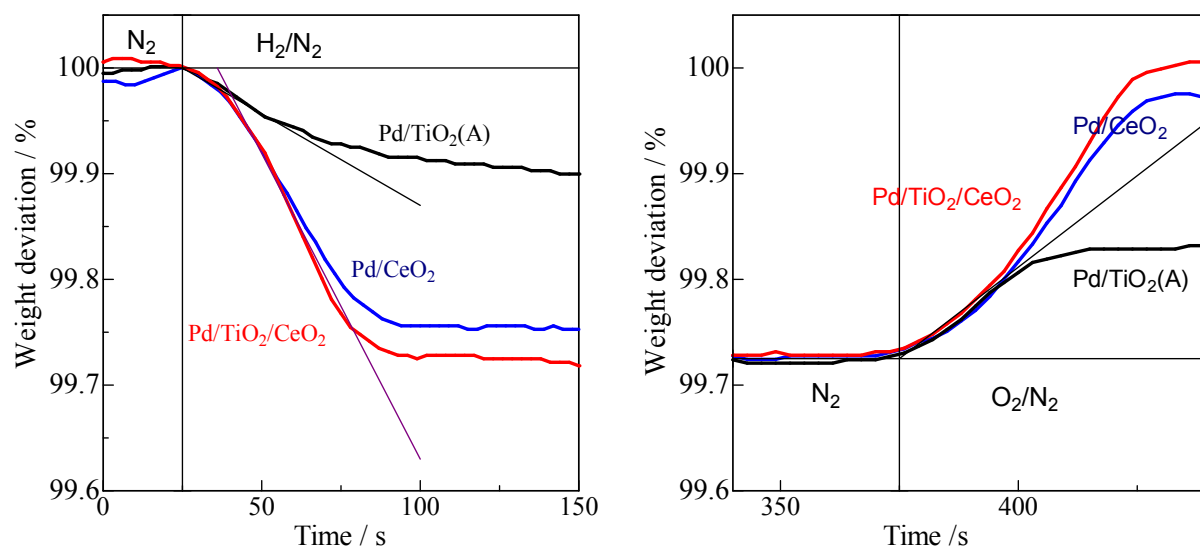

**Fig. 3S** Estimation of initial reduction and oxidation rates by weight deviation during O<sub>2</sub>-H<sub>2</sub> periodic operation at 300 °C. Estimated reduction rates are  $-0.54 \times 10^{-6} \text{ mol-O}_2 \text{ g}^{-1} \text{ s}^{-1}$  for Pd/TiO<sub>2</sub>, and  $-1.8 \times 10^{-6} \text{ mol-O}_2 \text{ g}^{-1} \text{ s}^{-1}$  for Pd/CeO<sub>2</sub> and Pd/TiO<sub>2</sub>/CeO<sub>2</sub>. Estimated oxidation rates are  $0.94 \times 10^{-6} \text{ mol-O}_2 \text{ g}^{-1} \text{ s}^{-1}$  for all three catalysts.
